# Supplementary material for: Microbial mediation in chalcopyrite formation at low temperature
Source: Research Square preprint supplement (doi:10.21203/rs.3.rs-6057462/v1), 2025-03-26
Supplement: Supplementary file 1 [file c6eff1b784c4bc9c7e619cba.docx]

Supplementary data

***
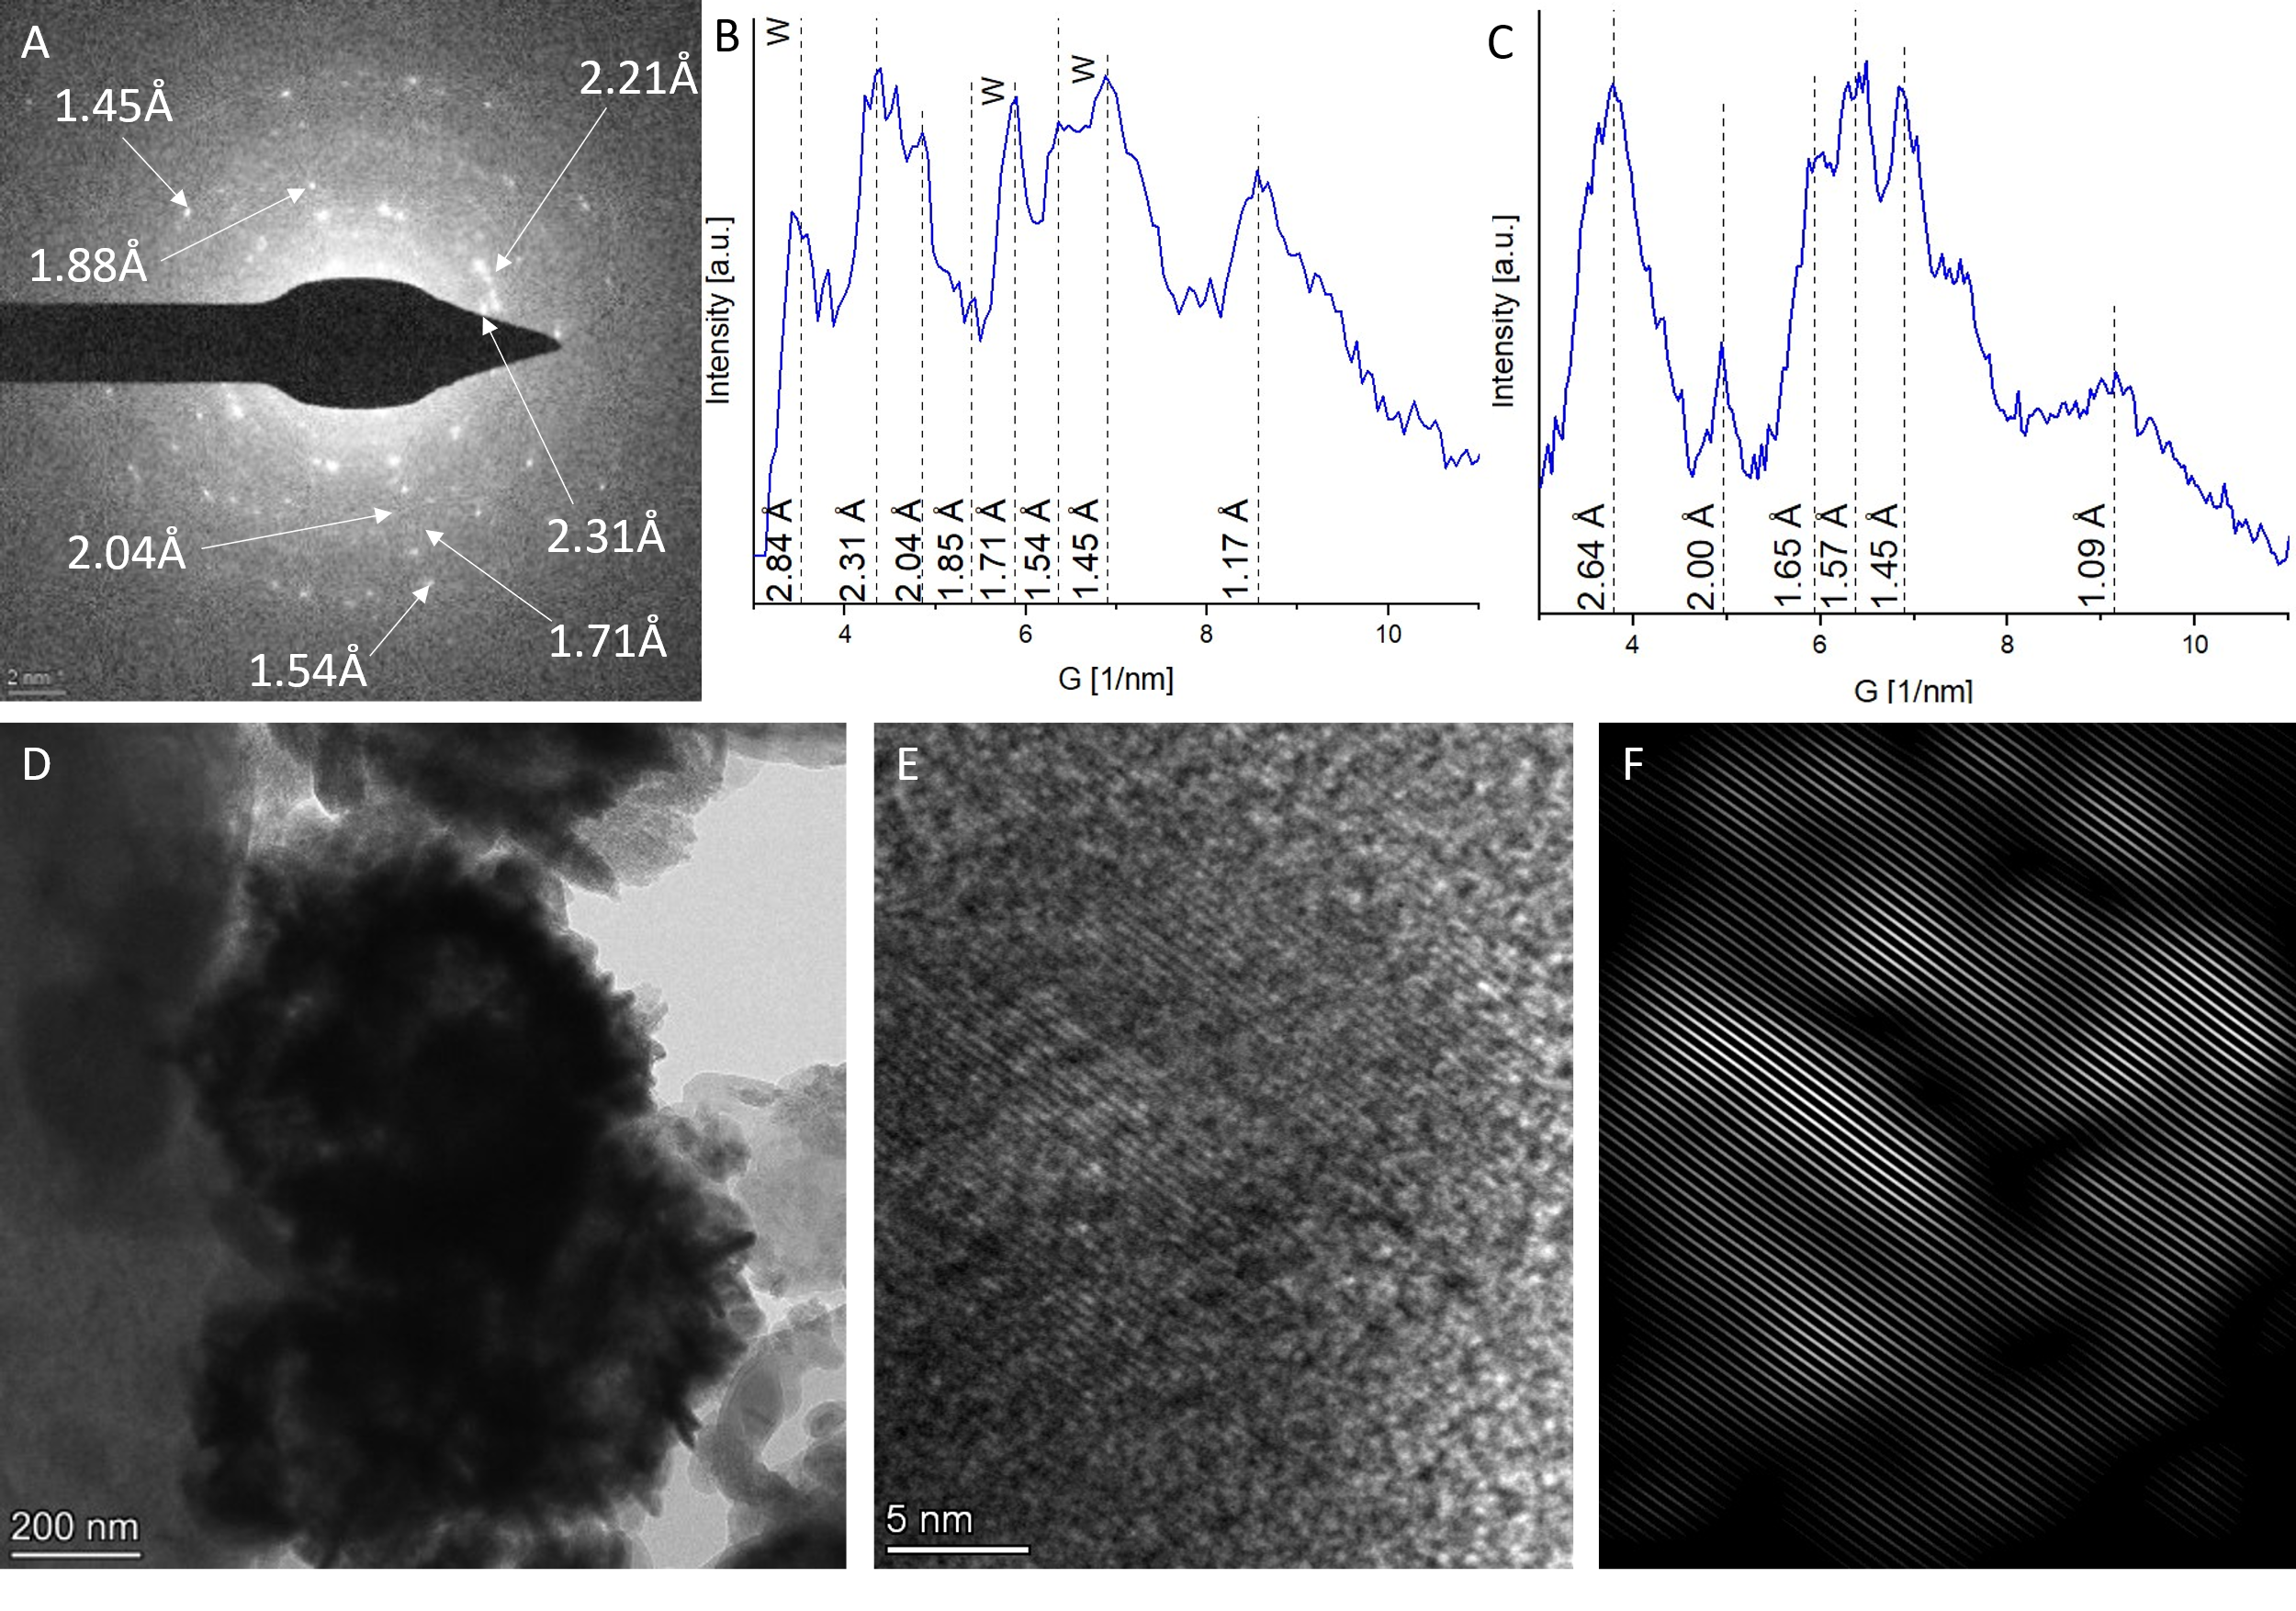
***

***Supplementary Figure 1.*** *STEM results.* ***(A,B)*** *SAED of the acicular Cu-Fe sulfide aggregate from the Fig. 3a and corresponding color profile (note that the letter “w” marks potential peaks of wurtzite, which appear together with the Cu-Fe phase).* ***(C)*** *Color profile for the SAED from the Fig. 3h.* ***(D)*** *Bright-field image of the aggregate from the Fig. 3f.* ***(E-F)*** *Amplified image of the lattice fringes showed in the Fig.3j and the corresponding filtered image.*

***Supplementary Table 1.*** *Geochemical analyses of the pore water recovered from sediment samples from Filon Centro ICs. Concentration expressed as mg/L.*

| ***Element*** | ***FC18 (monimolimnion)*** | | |  | ***FC0 (mixolimnion)*** | | |
| --- | --- | --- | --- | --- | --- | --- | --- |
|  | Unt (-1cm) | Gly (-1cm) | 4 °C (-1cm) |  | Unt (-1cm) | Gly (-1cm) | 4 °C (-1cm) |
| ***SO4*** | 4377 | 6620 | 6984 |  | 5701 | 14101 | 5138 |
| ***Cu*** | 34 | b.d. | 444 |  | 14 | b.d. | 16 |
| ***Fe*** | 571 | 3504 | 829 |  | 1306 | 6478 | 351 |

***Supplementary Table 2.*** *Distribution of Fe, Cu and S in different fractions obtained by sequential extraction of sediment samples at different depth from Filon Centro 18m and 0m incubation column experiments (untreated, glycerol-amended and 4 °C-stored) after 18 mo (Further incubation setup was described in Ilin et al., 2022). Concentration expressed as ppm.*

| ***Element*** | ***Step*** | ***FC18 (monimolimnion)*** | | |  | ***FC0 (mixolimnion)*** | |
| --- | --- | --- | --- | --- | --- | --- | --- |
|  |  | Unt (-1cm) | Gly (-1cm) | 4 °C (-1cm) |  | Unt (-1cm) | Gly (-1cm) |
| ***S*** | *1* | 703 | 682 | 567 |  | 2064 | 1469 |
| ***ppm*** | *2* | 407 | 236 | 327 |  | 2943 | 751 |
|  | *3* | 817 | 55 | 861 |  | 1101 | 76 |
|  | *4* | b.d. | b.d. | b.d. |  | b.d. | b.d. |
|  | *5* | 334 | 380 | 309 |  | 602 | 307 |
|  | ***6*** | **8637** | **4708** | **3192** |  | **617** | **1284** |
| ***Cu*** | *1* | 4 | 27 | 65 |  | 11 | 31 |
| ***ppm*** | *2* | 5 | 31 | 31 |  | b.d. | 10 |
|  | *3* | 11 | 36 | 18 |  | 24 | 30 |
|  | *4* | b.d. | 1 | b.d. |  | 3 | 1 |
|  | *5* | 8 | 28 | 10 |  | 17 | 9 |
|  | ***6*** | **42** | **122** | **45** |  | **16** | **31** |
| ***Fe*** | *1* | 70 | 295 | 84 |  | 775 | 695 |
| ***ppm*** | *2* | 151 | 85 | 142 |  | 1704 | 1532 |
|  | *3* | 4286 | 2449 | 3235 |  | 26179 | 4894 |
|  | *4* | 13434 | 9781 | 8461 |  | 6073 | 34520 |
|  | *5* | 40 | 28 | 30 |  | 48.54 | 62.16 |
|  | ***6*** | **744** | **1188** | **488** |  | **6** | **21** |

***
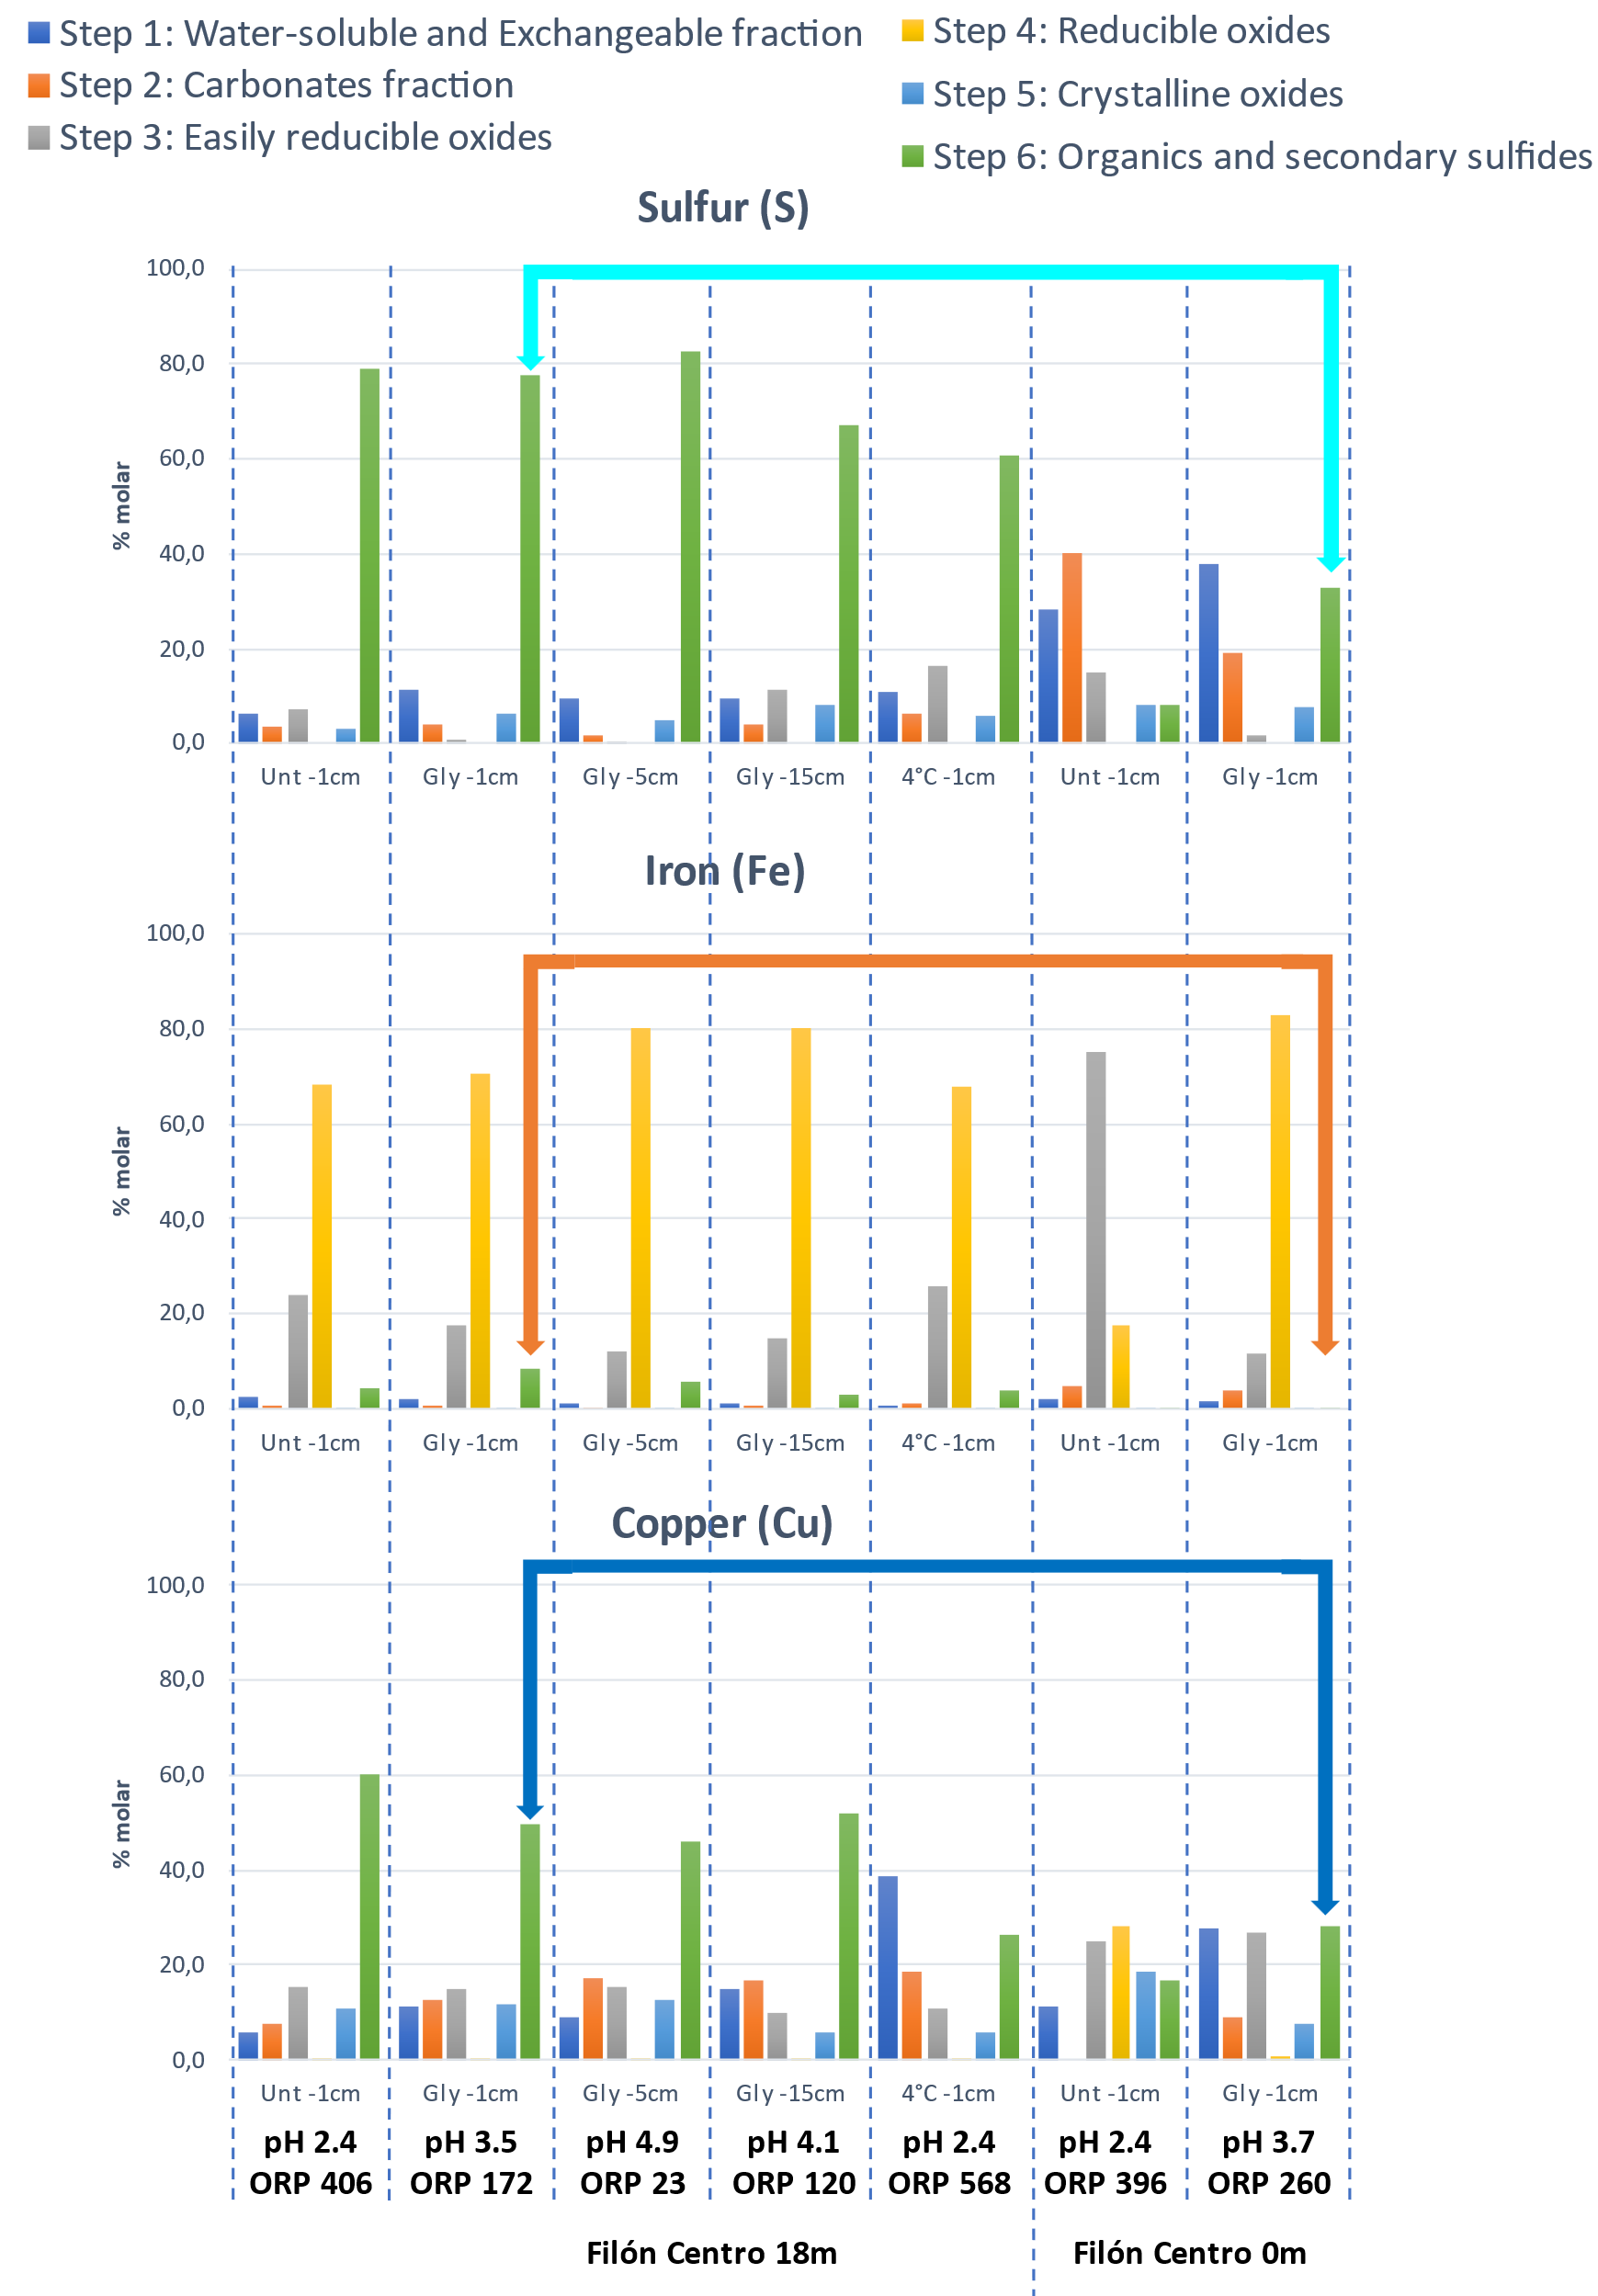
***

***Supplementary Figure 2.*** *Results of the selective dissolution of different sediment layers of the incubation columns after 18 months of incubation following Sequential Extraction protocol showing the distribution of Fe, Cu and S in different fractions expressed in molar percent.*

***Supplementary Table 3.*** *Parameters used for geochemical modelling. Concentrations provided in mg/L. Temperature was set to a constant 25 °C.*

|  | ***Graph A*** | ***Graph B*** | ***Graph C*** | ***Graph D*** | ***Graph E*** | ***Graph F*** |
| --- | --- | --- | --- | --- | --- | --- |
| ***Fe(total)*** | ***570*** |  |  |  |  |  |
| ***Fe(II)*** |  | ***570*** | ***570*** | ***570*** | ***570*** | ***570*** |
| ***Cu (total)*** | ***35*** |  |  |  |  | ***35*** |
| ***Cu(II)*** |  | ***variable*** | ***35*** | ***35*** | ***35*** |  |
|  | ***4400*** | ***4400*** | ***4400*** | ***4400*** | ***4400*** | ***4400*** |
| ***H2S*** | ***10*** | ***10*** |  |  |  |  |
| ***S2-*** |  |  | ***variable*** |  | ***variable*** |  |
| ***pH*** | ***variable*** | ***4.0*** |  | ***4.0*** | ***4.0*** | ***4.0*** |
| ***pe*** |  |  |  | ***variable*** |  | ***variable*** |
